# Supplementary material for: Absence of Stress Response in Dorsal Raphe Nucleus in Modulator of Apoptosis 1-Deficient Mice
Source: PubMed Central journal article supplement (PMC6394635; doi:10.1007/s12035-018-1205-7), 2018-07-12
Supplement: 12035_2018_1205_MOESM1_ESM.pdf [file 12035_2018_1205_MOESM1_ESM.pdf]

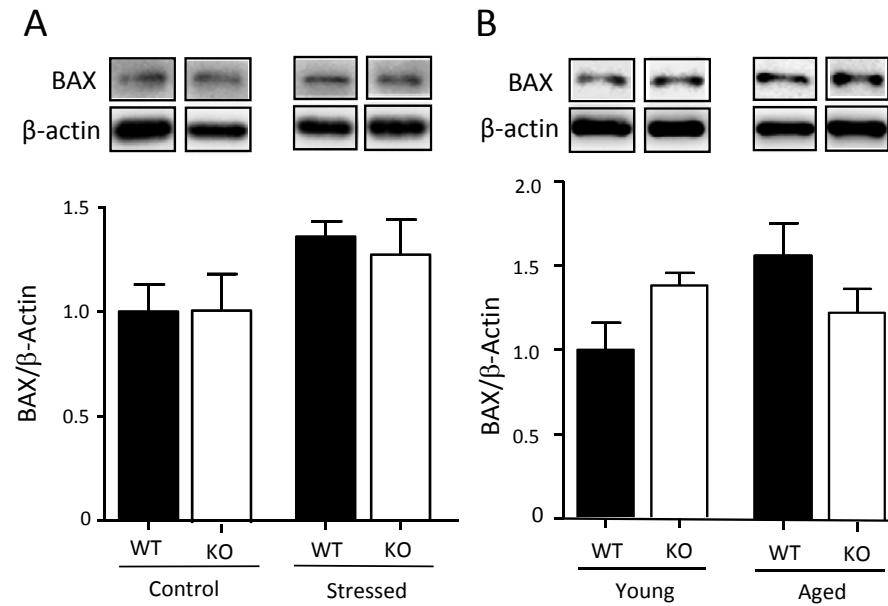

**Fig. S1. Expression of apoptosis regulator Bax in the midbrain region of MOAP-1<sup>-/-</sup> (KO) and wildtype control (WT) mice.** Data are presented as Mean  $\pm$  SEM, n = 3-4. (A) No significant changes after repeated forced swimming stress in both WT and MOAP-1<sup>-/-</sup> mice, ANOVA: F=1.615. (B) No significant changes were observed between young (3-6 months) and aged (22-26 months) mice, ANOVA: F=2.594.

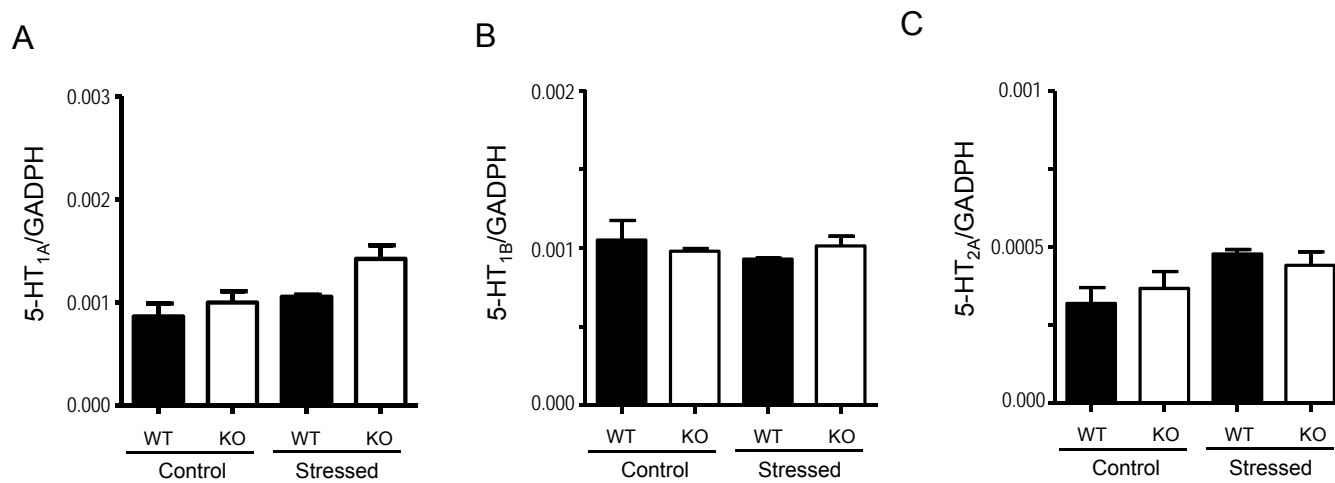

Fig. S2. Relative mRNA expression of (A) 5-HT<sub>1A</sub>, (B) 5-HT<sub>1B</sub> and (C) 5-HT<sub>2A</sub> in the midbrain of WT and MOAP-1<sup>-/-</sup> (KO) mice with or without 3d-RFSS treatment (n=3-4). Data are presented as Mean ± SEM. No significant differences between either WT vs KO or Control vs Stressed. ANOVA, F = 4.910, 0.5047 and 2.774, respectively. Note: Although the F value for A is significant overall, the only significant difference occurred between the WT Control vs KO Stressed.

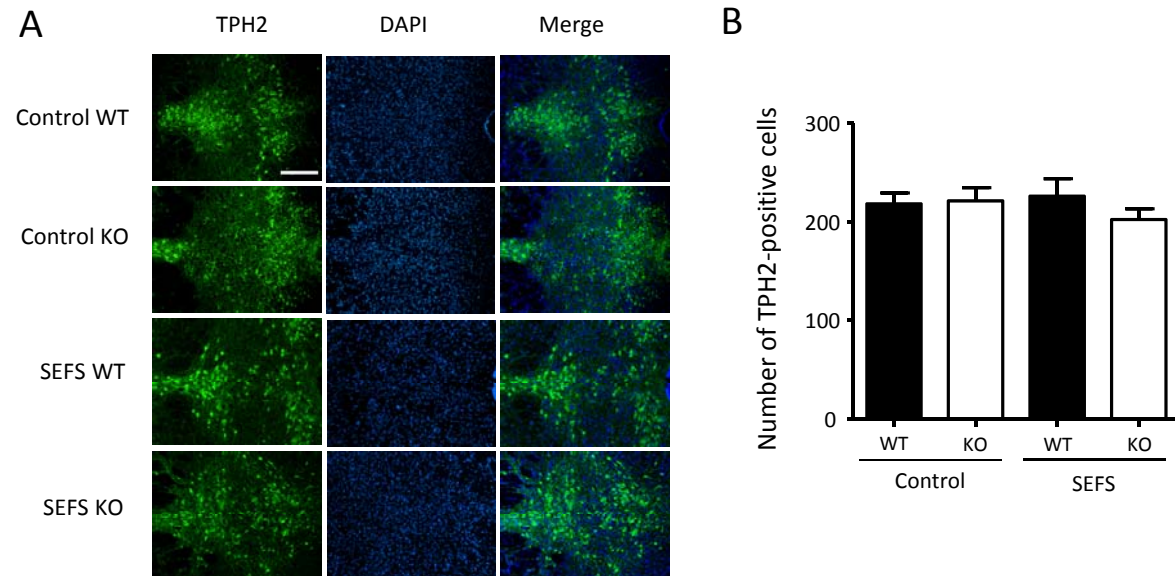

**Fig. S3. TPH2 expression in the DRN did not change after a single exposure to forced swimming (SEFS).** (A) Representative photomicrographs of TPH2 immunofluorescent staining in the DRN of the WT and MOAP-1<sup>-/-</sup> mice after a single exposure to forced swimming stress. Scale bar = 200  $\mu$ m. (B) Number of TPH2 immunopositive cells in the DRN in WT and MOAP-1<sup>-/-</sup> mice after a single exposure to forced swimming stress, n=3. Data are presented as Mean $\pm$ SEM. No statistical significance by ANOVA: F=0.741.

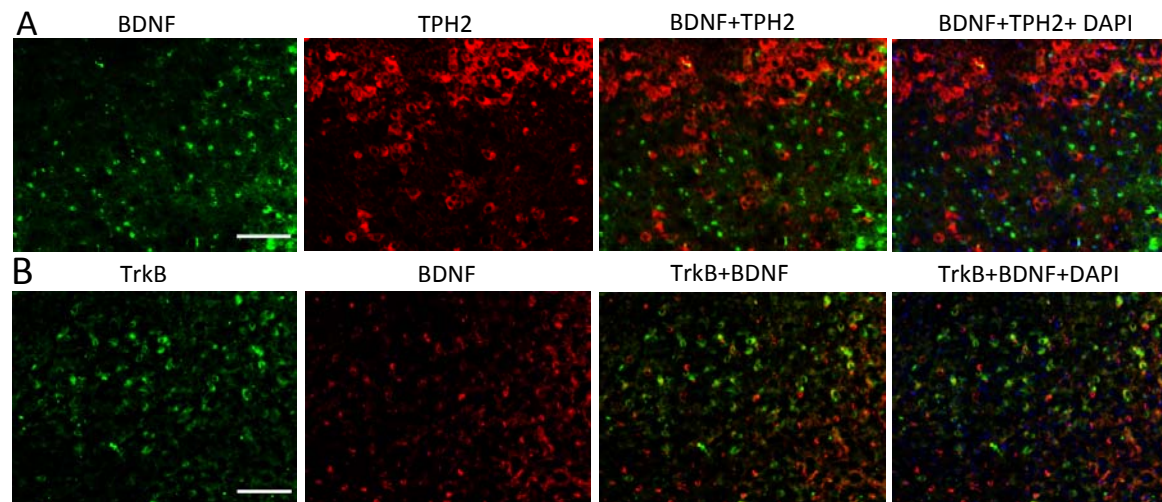

**Fig. S4. Double immunostaining of (A) BDNF/TPH2 and (B) BDNF/TrkB receptor in the DRN of wildtype mice.** Scale bars = 100  $\mu$ m. No colocalization was observed.

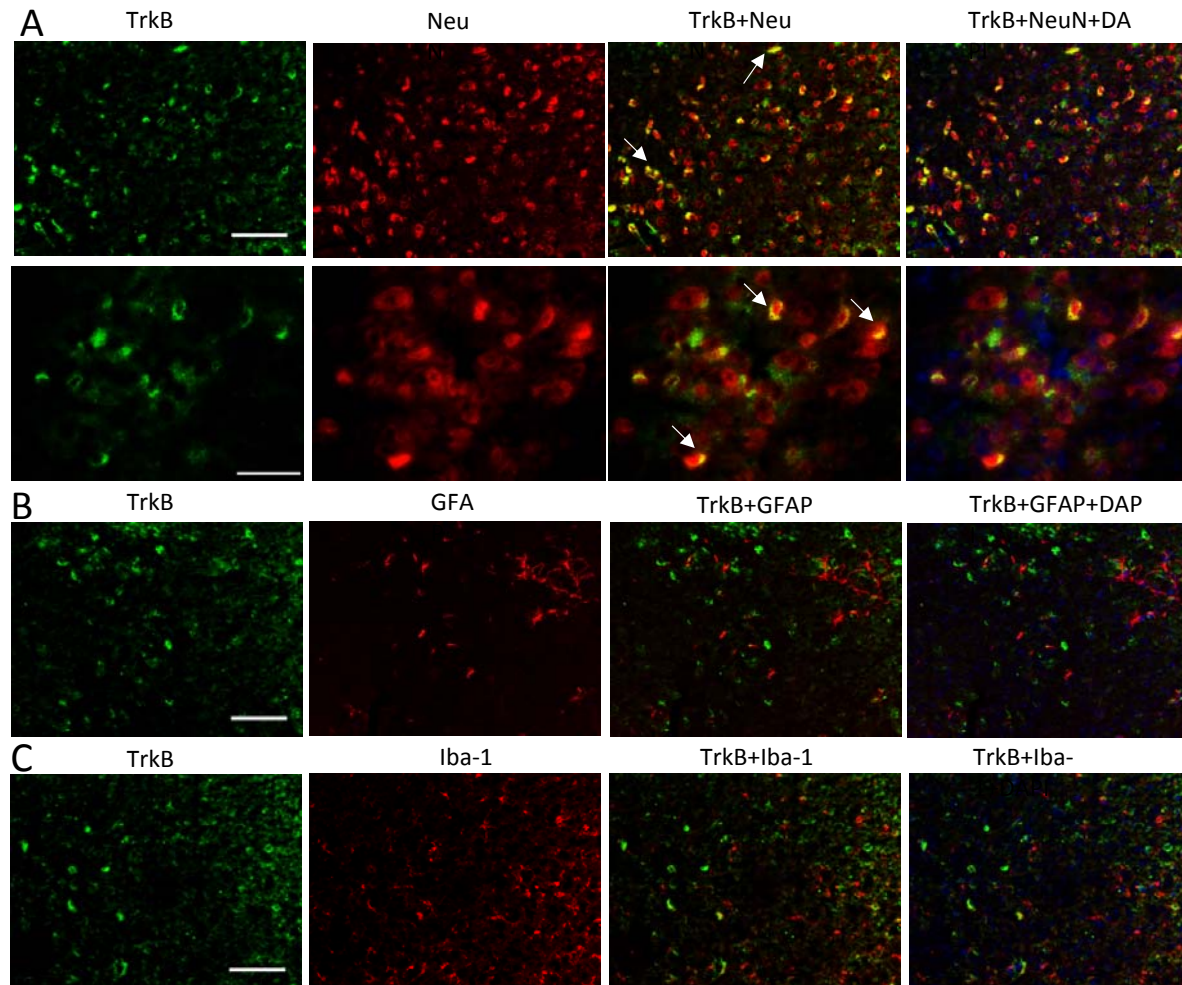

**Fig. S5. Cellular localization of TrkB in the DRN of wildtype mice.** (A) Double staining of TrkB with NeuN showing colocalization. Scale bar = 100  $\mu$ m (top) and 50  $\mu$ m (bottom). White arrows indicate colocalization. (B) Double staining of TrkB with GFAP showing no colocalization. Scale as in A top panel. (C) Double staining of TrkB with Iba-1 showing no colocalization. Scale as in A top panel.
